# Supplementary material
Source: MDPI journal article supplement (https://www.mdpi.com/2673-5318/4/3/20)
Supplement: s1 [file s1]

## Supplementary Material

**Table S1.** Other demographic characteristics.

|                      |                         | <b>Total (%)</b><br><b>n = 129</b> | <b>Females (%)</b><br><b>n = 71</b> | <b>Males (%)</b><br><b>n = 58</b> |
|----------------------|-------------------------|------------------------------------|-------------------------------------|-----------------------------------|
| marital status       | Unmarried               | 40 (31)                            | 28 (39)                             | 12 (20)                           |
|                      | married                 | 74 (57)                            | 34 (47)                             | 40 (68)                           |
|                      | divorced                | 3 (2)                              | 3 (4)                               | 0 (0)                             |
|                      | n/a                     | 12 (9)                             | 6 (8)                               | 6 (10)                            |
| status of employment | full-time               | 82 (63)                            | 36 (50)                             | 46 (79)                           |
|                      | part-time               | 35 (27)                            | 29 (40)                             | 6 (10)                            |
|                      | n/a                     | 12 (9)                             | 6 (8)                               | 6 (10)                            |
| socioeconomic status | Less than \$19,250      | 11 (8)                             | 9 (12)                              | 2 (3)                             |
|                      | \$19,250 to \$38,500    | 34 (26)                            | 23 (32)                             | 11 (18)                           |
|                      | \$38,500 to \$57,750    | 25 (19)                            | 18 (25)                             | 7 (12)                            |
|                      | \$67,500 to \$77,000    | 32 (24)                            | 10 (14)                             | 22 (37)                           |
|                      | \$77,000 or more        | 15 (11)                            | 5 (7)                               | 10 (17)                           |
|                      | n/a                     | 12 (9)                             | 6 (8)                               | 6 (10)                            |
| educational level    | Junior high school      | 4 (3)                              | 3 (4)                               | 1 (1)                             |
|                      | High school             | 12 (9)                             | 11 (15)                             | 1 (1)                             |
|                      | junior college          | 9 (6)                              | 8 (11)                              | 1 (1)                             |
|                      | College/University      | 76 (58)                            | 37 (52)                             | 39 (67)                           |
|                      | graduate school         | 16 (12)                            | 6 (8)                               | 10 (17)                           |
|                      | n/a                     | 12 (9)                             | 6 (8)                               | 6 (10)                            |
| alcohol use          | never                   | 34 (26)                            | 27 (38)                             | 7 (12)                            |
|                      | 3 days per week or less | 69 (53)                            | 34 (47)                             | 35 (60)                           |
|                      | 4days per week or more  | 26 (20)                            | 10 (14)                             | 16 (27)                           |
| smoking              | no smoking              | 103 (79)                           | 63 (88)                             | 40 (68)                           |
|                      | smoking                 | 26 (20)                            | 8 (11)                              | 18 (31)                           |

"n/a" means Not Available. We calculated \$1 = ¥130.

**Table S2.** Correlation analysis of Internet usage time during weekdays.

|                      | Internet Usage Time During <u>weekdays</u> |              |                |       |                |              |                   |              |                 |       |
|----------------------|--------------------------------------------|--------------|----------------|-------|----------------|--------------|-------------------|--------------|-----------------|-------|
|                      | Total participants<br>n = 129              |              | SNS–<br>n = 85 |       | SNS+<br>n = 44 |              | Females<br>n = 71 |              | Males<br>n = 58 |       |
|                      | r                                          | p            | r              | p     | r              | p            | r                 | p            | r               | p     |
| BDI-II               | 0.029                                      | 0.757        | −0.063         | 0.591 | 0.155          | 0.341        | 0.12              | 0.345        | −0.05           | 0.728 |
| PHQ-9                | 0.001                                      | 0.995        | −0.115         | 0.294 | 0.195          | 0.204        | 0.014             | 0.907        | 0.029           | 0.83  |
| HRSD                 | 0.127                                      | 0.155        | 0.203          | 0.066 | −0.023         | 0.882        | 0.118             | 0.332        | 0.197           | 0.142 |
| TACS-22 #            | −0.012                                     | 0.894        | −0.039         | 0.729 | 0.022          | 0.889        | −0.063            | 0.602        | 0.061           | 0.652 |
| HQ 25                | −0.099                                     | 0.294        | −0.154         | 0.191 | −0.062         | 0.7          | −0.103            | 0.419        | −0.069          | 0.629 |
| IAT #                | 0.178                                      | 0.057        | 0.206          | 0.076 | 0.191          | 0.232        | 0.132             | 0.295        | 0.241           | 0.088 |
| SAS-SV               | 0.181                                      | <b>0.041</b> | 0.151          | 0.17  | <b>0.339</b>   | <b>0.024</b> | 0.216             | 0.07         | 0.131           | 0.33  |
| avoidant             | −0.063                                     | 0.5          | −0.154         | 0.183 | 0.071          | 0.659        | 0.048             | 0.702        | −0.177          | 0.209 |
| dependent            | 0.115                                      | 0.216        | 0.036          | 0.755 | 0.224          | 0.158        | 0.203             | 0.104        | 0.03            | 0.833 |
| Obsessive-compulsive | 0.057                                      | 0.545        | 0.073          | 0.533 | −0.087         | 0.59         | 0.185             | 0.14         | −0.085          | 0.549 |
| Passive-aggressive   | 0.122                                      | 0.19         | 0.045          | 0.702 | 0.247          | 0.12         | 0.228             | 0.067        | −0.087          | 0.539 |
| depressive           | 0.086                                      | 0.358        | −0.083         | 0.474 | <b>0.313</b>   | <b>0.046</b> | 0.118             | 0.349        | 0.077           | 0.589 |
| paranoid             | 0.038                                      | 0.686        | 0.007          | 0.95  | 0.048          | 0.767        | 0.053             | 0.673        | 0.005           | 0.974 |
| schizotypal          | 0.116                                      | 0.215        | 0.029          | 0.802 | <b>0.321</b>   | <b>0.041</b> | 0.2               | 0.11         | 0.038           | 0.791 |
| schizoid             | 0.054                                      | 0.566        | −0.045         | 0.701 | 0.143          | 0.373        | 0.06              | 0.636        | 0.092           | 0.517 |
| histrionic           | 0.168                                      | 0.071        | 0.141          | 0.224 | 0.277          | 0.08         | <b>0.336</b>      | <b>0.006</b> | −0.14           | 0.321 |
| narcissistic         | 0.159                                      | 0.088        | 0.047          | 0.685 | <b>0.335</b>   | <b>0.035</b> | <b>0.291</b>      | <b>0.02</b>  | −0.101          | 0.478 |
| borderline           | 0.175                                      | 0.059        | 0.103          | 0.374 | 0.244          | 0.124        | 0.205             | 0.101        | 0.255           | 0.068 |
| antisocial           | 0.088                                      | 0.345        | 0.08           | 0.497 | 0.123          | 0.445        | 0.055             | 0.661        | 0.083           | 0.561 |

SNS+ indicates those who used the Internet primarily for SNS, and SNS– those who used it for other purposes. # These items were normally distributed. r: Spearman's or Pearson's correlation estimates, capitalized if  $r > 0.2$  and  $p$ -value  $< 0.05$ . BDI-II: the Beck Depression Inventory II, PHQ-9: Patient Health Questionnaire-9, HRSD: the Hamilton Rating Scale for Depression, TACS-22: the 22-item Tatum's Modern-Type Depression Trait Scale, HQ-25: the Hikikomori Questionnaire has self-rated 25 items, IAT: Young's Internet Addiction Test, SAS-SV: Smartphone Addiction Scale-Short Version, SCID-II-PQ: the Structured Clinical Interview for the Diagnostic and Statistical Manual of Mental Disorders, Fourth Edition (DSM-IV) Personality Disorders Personality Questionnaire.

**Table S3.** Correlation analysis between Internet usage time during holidays and each mental rating scale when classified by SNS-/+ AND gender.

|                      | Internet Usage Time during Holidays |              |                           |              |                         |              |                         |              |
|----------------------|-------------------------------------|--------------|---------------------------|--------------|-------------------------|--------------|-------------------------|--------------|
|                      | SNS–<br>Females<br>n = 40           |              | SNS+<br>Females<br>n = 31 |              | SNS–<br>Males<br>n = 45 |              | SNS+<br>Males<br>n = 13 |              |
|                      | r                                   | p            | r                         | p            | r                       | p            | r                       | p            |
| BDI-II               | −0.224                              | 0.196        | <b>0.372</b>              | <b>0.047</b> | 0.192                   | 0.234        | −0.398                  | 0.226        |
| PHQ-9                | −0.015                              | 0.929        | 0.281                     | 0.126        | 0.205                   | 0.177        | 0.128                   | 0.677        |
| HRSD                 | 0.095                               | 0.571        | 0.254                     | 0.168        | 0.270                   | 0.073        | <b>−0.679</b>           | <b>0.015</b> |
| TACS-22 #            | −0.082                              | 0.620        | 0.157                     | 0.399        | 0.134                   | 0.388        | −0.126                  | 0.682        |
| HQ 25                | −0.100                              | 0.569        | 0.215                     | 0.263        | 0.148                   | 0.370        | −0.252                  | 0.430        |
| IAT #                | 0.143                               | 0.405        | <b>0.567</b>              | <b>0.001</b> | <b>0.443</b>            | <b>0.005</b> | 0.031                   | 0.923        |
| SAS-SV               | <b>0.430</b>                        | <b>0.006</b> | <b>0.407</b>              | <b>0.023</b> | <b>0.351</b>            | <b>0.019</b> | −0.039                  | 0.898        |
| avoidant             | 0.023                               | 0.894        | 0.132                     | 0.496        | 0.094                   | 0.564        | −0.122                  | 0.705        |
| dependent            | 0.150                               | 0.382        | 0.235                     | 0.220        | 0.178                   | 0.271        | −0.403                  | 0.194        |
| Obsessive-compulsive | 0.094                               | 0.587        | 0.278                     | 0.145        | −0.003                  | 0.985        | <b>−0.700</b>           | <b>0.011</b> |
| Passive-aggressive   | −0.016                              | 0.926        | 0.195                     | 0.310        | 0.063                   | 0.698        | 0.060                   | 0.853        |
| depressive           | −0.026                              | 0.881        | 0.282                     | 0.139        | 0.130                   | 0.424        | 0.048                   | 0.883        |
| paranoid             | −0.151                              | 0.380        | −0.004                    | 0.985        | 0.122                   | 0.453        | 0.249                   | 0.435        |
| schizotypal          | 0.189                               | 0.269        | 0.229                     | 0.232        | −0.008                  | 0.959        | 0.504                   | 0.095        |
| schizoid             | 0.082                               | 0.634        | 0.184                     | 0.340        | 0.030                   | 0.855        | 0.247                   | 0.438        |
| histrionic           | −0.190                              | 0.268        | 0.364                     | 0.052        | −0.102                  | 0.532        | <b>−0.580</b>           | <b>0.048</b> |
| narcissistic         | 0.015                               | 0.932        | 0.307                     | 0.111        | 0.009                   | 0.954        | −0.091                  | 0.778        |
| borderline           | −0.027                              | 0.875        | <b>0.420</b>              | <b>0.023</b> | 0.115                   | 0.478        | 0.424                   | 0.169        |
| antisocial           | −0.243                              | 0.153        | 0.086                     | 0.656        | 0.083                   | 0.614        | −0.188                  | 0.559        |

Table S4. Internet usage during holidays classified by hour.

| Number of hours of Internet Usage during Holidays |                         |                          |                        |                       |                       |                        |                         |                          |                           |        |                                  |                               |
|---------------------------------------------------|-------------------------|--------------------------|------------------------|-----------------------|-----------------------|------------------------|-------------------------|--------------------------|---------------------------|--------|----------------------------------|-------------------------------|
| Hours                                             | Total<br>n = 129<br>(%) | Gender                   | Purpose                |                       | SNS Type              |                        |                         |                          |                           |        | No Use of<br>SNS<br>n = 5<br>(%) | Others or<br>no Data<br>n = 4 |
|                                                   |                         | Females<br>n = 71<br>(%) | Males<br>n = 58<br>(%) | SNS-<br>n = 85<br>(%) | SNS+<br>n = 44<br>(%) | LINE<br>n = 105<br>(%) | Twitter<br>n = 9<br>(%) | Facebook<br>n = 3<br>(%) | Instagram<br>n = 5<br>(%) |        |                                  |                               |
| 0                                                 | 6 (4.7)                 | 2 (2.8)                  | 4 (6.9)                | 5 (5.9)               | 1 (2.3)               | 4 (3.8)                |                         |                          |                           |        | 2 (40)                           |                               |
| 1                                                 | 29 (22.5)               | 15 (21.1)                | 14 (24.1)              | 17 (20)               | 12 (27.3)             | 25 (23.8)              | 1 (11.1)                | 1 (33.3)                 | 1 (20)                    | 1 (20) |                                  |                               |
| 2                                                 | 34 (26.4)               | 18 (25.4)                | 16 (27.6)              | 21 (24.7)             | 13 (29.5)             | 28 (26.7)              | 2 (22.2)                | 1 (33.3)                 | 2 (40)                    | 2 (40) | 1 (25)                           |                               |
| 3                                                 | 24 (18.6)               | 12 (16.9)                | 12 (20.7)              | 16 (18.8)             | 8 (18.2)              | 21 (20)                | 1 (11.1)                |                          | 2 (40)                    |        |                                  |                               |
| 4                                                 | 16 (12.4)               | 10 (14.1)                | 6 (10.3)               | 12 (14.1)             | 4 (9.1)               | 12 (11.4)              | 2 (22.2)                |                          |                           |        | 2 (50)                           |                               |
| 5                                                 | 6 (4.7)                 | 4 (5.6)                  | 2 (3.4)                | 5 (5.9)               | 1 (2.3)               | 5 (4.8)                |                         | 1 (33.3)                 |                           |        |                                  |                               |
| 6                                                 | 11 (8.5)                | 9 (12.7)                 | 2 (3.4)                | 6 (7.1)               | 5 (11.4)              | 8 (7.6)                | 2 (22.2)                |                          |                           |        | 1 (25)                           |                               |
| 7                                                 |                         |                          |                        |                       |                       |                        |                         |                          |                           |        |                                  |                               |
| 8                                                 |                         |                          |                        |                       |                       |                        |                         |                          |                           |        |                                  |                               |
| 9                                                 | 1 (0.8)                 | 1 (1.4)                  |                        | 1 (1.2)               |                       | 1 (1)                  |                         |                          |                           |        |                                  |                               |
| 10                                                |                         |                          |                        |                       |                       |                        |                         |                          |                           |        |                                  |                               |
| 11                                                |                         |                          |                        |                       |                       |                        |                         |                          |                           |        |                                  |                               |
| 12                                                | 1 (0.8)                 |                          | 1 (1.7)                | 1 (1.2)               |                       | 1 (1)                  |                         |                          |                           |        |                                  |                               |
| 13                                                |                         |                          |                        |                       |                       |                        |                         |                          |                           |        |                                  |                               |
| 14                                                |                         |                          |                        |                       |                       |                        |                         |                          |                           |        |                                  |                               |
| 15                                                | 1 (0.8)                 |                          | 1 (1.7)                | 1 (1.2)               |                       |                        | 1 (11.1)                |                          |                           |        |                                  |                               |

Internet usage time was used for holidays. Hours were rounded down after the decimal. SNS+ indicates those who used the Internet primarily for SNS, and SNS- those who used it for other purposes. The SNS type questions were asked which of "LINE," "Twitter," "Facebook," "Instagram."

| Number of Hours of Internet Usage during Holidays |                           |                           |                                       |                                     |                             |                           |                             |                          |                            |                               |                             |                             |
|---------------------------------------------------|---------------------------|---------------------------|---------------------------------------|-------------------------------------|-----------------------------|---------------------------|-----------------------------|--------------------------|----------------------------|-------------------------------|-----------------------------|-----------------------------|
| Personality type based on SCID-II-PQ              |                           |                           |                                       |                                     |                             |                           |                             |                          |                            |                               |                             |                             |
| Hours                                             | Avoidant<br>n = 28<br>(%) | Dependent<br>n = 7<br>(%) | Obsessive-Compulsive<br>n = 41<br>(%) | Passive-Aggressive<br>n = 14<br>(%) | Depressive<br>n = 16<br>(%) | Paranoid<br>n = 13<br>(%) | Schizotypal<br>n = 4<br>(%) | Schizoid<br>n = 6<br>(%) | Histrionic<br>n = 6<br>(%) | Narcissistic<br>n = 13<br>(%) | Borderline<br>n = 17<br>(%) | Antisocial<br>n = 18<br>(%) |
| 0                                                 |                           |                           | 2 (4.9)                               |                                     |                             |                           |                             |                          |                            |                               |                             | 1 (5.6)                     |
| 1                                                 | 5 (17.9)                  |                           | 9 (22)                                |                                     | 3 (18.8)                    | 2 (15.4)                  |                             | 2 (33.3)                 | 2 (33.3)                   | 4 (30.8)                      | 2 (11.8)                    | 5 (27.8)                    |
| 2                                                 | 8 (28.6)                  | 2 (28.6)                  | 8 (19.5)                              | 7 (50)                              | 5 (31.3)                    | 7 (53.8)                  |                             | 1 (16.7)                 | 3 (50)                     | 4 (30.8)                      | 5 (29.4)                    | 1 (5.6)                     |
| 3                                                 | 8 (28.6)                  | 3 (42.9)                  | 7 (17.1)                              | 4 (28.6)                            | 3 (18.8)                    | 3 (23.1)                  | 1 (25)                      | 1 (16.7)                 |                            | 2 (15.4)                      | 2 (11.8)                    | 4 (22.2)                    |
| 4                                                 | 3 (10.7)                  |                           | 9 (22)                                | 1 (7.1)                             | 2 (12.5)                    |                           | 1 (25)                      | 1 (16.7)                 |                            | 1 (7.7)                       | 4 (23.5)                    | 2 (11.1)                    |
| 5                                                 | 1 (3.6)                   |                           | 2 (4.9)                               | 2 (14.3)                            | 1 (6.3)                     |                           | 1 (25)                      |                          |                            | 1 (7.7)                       | 1 (5.9)                     | 1 (5.6)                     |
| 6                                                 | 3 (10.7)                  | 2 (28.6)                  | 4 (9.8)                               |                                     | 2 (12.5)                    | 1 (7.7)                   | 1 (25)                      | 1 (16.7)                 | 1 (16.7)                   | 1 (7.7)                       | 3 (17.6)                    | 2 (11.1)                    |
| 7                                                 |                           |                           |                                       |                                     |                             |                           |                             |                          |                            |                               |                             |                             |
| 8                                                 |                           |                           |                                       |                                     |                             |                           |                             |                          |                            |                               |                             |                             |
| 9                                                 |                           |                           |                                       |                                     |                             |                           |                             |                          |                            |                               |                             |                             |
| 10                                                |                           |                           |                                       |                                     |                             |                           |                             |                          |                            |                               |                             |                             |
| 11                                                |                           |                           |                                       |                                     |                             |                           |                             |                          |                            |                               |                             |                             |
| 12                                                |                           |                           |                                       |                                     |                             |                           |                             |                          |                            |                               |                             | 1 (5.6)                     |
| 13                                                |                           |                           |                                       |                                     |                             |                           |                             |                          |                            |                               |                             |                             |
| 14                                                |                           |                           |                                       |                                     |                             |                           |                             |                          |                            |                               |                             |                             |
| 15                                                |                           |                           |                                       |                                     |                             |                           |                             |                          |                            |                               |                             | 1 (5.6)                     |

SCID-II-PQ: the Structured Clinical Interview for the Diagnostic and Statistical Manual of Mental Disorders, Fourth Edition (DSM-IV) Personality Disorders Personality Questionnaire. Personality type was rated as having personality traits if the Self-Rated Question based on the SCID-II-PQ was above the cutoff. Personality type judgments are based on subjective evaluation and are not objective diagnoses. The cutoff points are as follows; avoidant 4 points, dependent 5 points, obsessive-compulsive 4 points, passive-aggressive 4 points, depressive 5 points, paranoid 4 points, schizotypal 5 points, schizoid 4 points, histrionic 5 points, narcissistic 5 points, borderline 5 points, and antisocial 3 points.
